# Supplementary material for: Clinical and genetic correlates of islet-autoimmune signatures in juvenile-onset type 1 diabetes
Source: PubMed Central journal article supplement (PMC6946733; doi:10.1007/s00125-019-05032-3), 2019-11-21
Supplement: 125_2019_5032_MOESM1_ESM.pdf [file 125_2019_5032_MOESM1_ESM.pdf]

**ESM Table 1 – Type 1 diabetes-associated SNP variants in non-HLA GRS**

| Region       | Position                 | Genes                                                                                  | rsID        | Risk allele | OR (risk allele) |
|--------------|--------------------------|----------------------------------------------------------------------------------------|-------------|-------------|------------------|
| T1D 1p13.2   | chr1:113288123-114009223 | PTPN22 PHTF1<br>PTPN22 PHTF1                                                           | rs2476601   | G>A         | 1.93             |
|              |                          |                                                                                        | rs6679677   | C>A         | 1.89             |
| T1D 1q32.1   | chr1:206709013-206867593 | IL10<br>IL10                                                                           | rs3024493   | A>C         | 1.22             |
|              |                          |                                                                                        | rs3024505   | A>G         | 1.18             |
| T1D 2q24.2   | chr2:162104363-162504293 | IFIH1<br>IFIH1<br>IFIH1                                                                | rs2111485   | A>G         | 1.18             |
|              |                          |                                                                                        | rs1990760   | G>A         | 1.15             |
|              |                          |                                                                                        | rs35667974  | G>A         | 1.69             |
| T1D 2q33.2   | chr2:203749263-203951852 | CTLA4<br>CTLA4                                                                         | rs3087243   | A>G         | 1.18             |
|              |                          |                                                                                        | rs11571316  | A>G         | 1.22             |
| T1D 2q13     | chr2:110225473-111045908 |                                                                                        | rs4849135   | A>C         | 1.12             |
| T1D 2p23.3   | chr2:24795892-25264789   | EFR3B                                                                                  | rs478222    | T>A         | 1.15             |
| T1D 2q11.2   | chr2:99926678-100432653  | AFF3                                                                                   | rs9653442   | A>G         | 1.11             |
| T1D 3p21.31  | chr3:46061249-46593299   | CCR5                                                                                   | rs113010081 | G>A         | 1.18             |
| T1D 4q32.3   | chr4:165571673-165682849 |                                                                                        | rs2611215   | G>A         | 1.18             |
| T1D 4q27     | chr4:122017479-122644147 | IL21 IL2 ADAD1<br>IL21 IL2 ADAD1<br>IL21 IL2 ADAD1<br>IL21 IL2 ADAD1                   | rs75793288  | C>G         | 1.15             |
|              |                          |                                                                                        | rs6827756   | G>A         | 1.13             |
|              |                          |                                                                                        | rs4505848   | A>G         | 1.12             |
|              |                          |                                                                                        | rs17388568  | G>A         | 1.19             |
| T1D 4p15.2   | chr4:26026175-26130530   |                                                                                        | rs10517086  | G>A         | 1.09             |
| T1D 5p13.2   | chr5:35798580-36036080   | IL7R                                                                                   | rs11954020  | G>C         | 1.11             |
| T1D 6q22.32  | chr6:126129075-127098552 | CENPW<br>CENPW<br>CENPW                                                                | rs1538171   | G>C         | 1.12             |
|              |                          |                                                                                        | rs9388489   | A>G         | 1.17             |
|              |                          |                                                                                        | rs9375435   | G>A         | 1.13             |
| T1D 6q15     | chr6:90097116-90320436   | BACH2<br>BACH2<br>BACH2                                                                | rs597325    | A>G         | 1.18             |
|              |                          |                                                                                        | rs11755527  | C>G         | NA*              |
|              |                          |                                                                                        | rs72928038  | G>A         | 1.20             |
| T1D 6q27     | chr6:169879562-170130554 |                                                                                        | rs924043    | A>G         | 1.19             |
| T1D 6q23.3   | chr6:137568592-137806067 | TNFAIP3                                                                                | rs6920220   | G>A         | 1.12             |
| T1D 6q25.3   | chr6:158897742-159119181 | TAGAP                                                                                  | rs1738074   | A>G         | 1.10             |
| T1D 7p15.2   | chr7:26618343-27162670   |                                                                                        | rs7804356   | G>A         | 1.14             |
| T1D 7p12.1   | chr7:50833203-51066332   | COBL                                                                                   | rs4948088   | A>C         | 1.30             |
| T1D 7p12.2   | chr7:50327041-50624014   | IKZF1                                                                                  | rs62447205  | G>A         | 1.12             |
| T1D 9p24.2   | chr9:4238265-4315442     | GLIS3<br>GLIS3<br>GLIS3                                                                | rs10758593  | G>A         | 1.15             |
|              |                          |                                                                                        | rs7020673   | G>C         | 1.14             |
|              |                          |                                                                                        | rs6476839   | T>A         | 1.12             |
| T1D 10p11.22 | chr10:32983821-33222119  | NRP1                                                                                   | rs722988    | A>G         | NA*              |
| T1D 10p15.1  | chr10:6388017-6503142    | PRKCQ                                                                                  | rs11258747  | C>A         | 1.13             |
| T1D 10p15.1  | chr10:5988280-6146375    | RBM17 IL2RA<br>RBM17 IL2RA<br>RBM17 IL2RA<br>RBM17 IL2RA<br>RBM17 IL2RA<br>RBM17 IL2RA | rs2104286   | G>A         | 1.30             |
|              |                          |                                                                                        | rs10795791  | A>G         | 1.16             |
|              |                          |                                                                                        | rs41295121  | A>G         | 2.04             |
|              |                          |                                                                                        | rs61839660  | A>G         | 1.61             |
|              |                          |                                                                                        | rs12251307  | A>G         | 1.33             |
|              |                          |                                                                                        | rs7090530   | C>A         | 1.22             |
| T1D 10q23.31 | chr10:88245291-88511262  | RNLS<br>RNLS                                                                           | rs10509540  | G>A         | 1.22             |
|              |                          |                                                                                        | rs12416116  | A>C         | 1.18             |
| T1D 11p15.5  | chr11:2092701-2260001    | INS<br>INS<br>INS                                                                      | rs689       | T>A         | 2.38             |
|              |                          |                                                                                        | rs72853903  | A>G         | 1.18             |
|              |                          |                                                                                        | rs7111341   | G>A         | NA*              |
| T1D 11p15.5  | chr11:2026410-2051274    | INS                                                                                    | rs7928968   | A>T         | 1.25             |

|              |                           |              |            |     |      |
|--------------|---------------------------|--------------|------------|-----|------|
| T1D 11q13.1  | chr11:64076473-64456055   | BAD          | rs694739   | G>A | NA*  |
| T1D 12q13.13 | chr12:53058065-53209207   | ITGB7        | rs11170466 | G>A | 1.19 |
| T1D 12q13.2  | chr12:55957562-56404651   | IKZF4 ERBB3  | rs705705   | C>G | 1.25 |
|              |                           | DGKA         | rs705704   | G>A | 1.35 |
|              |                           | IKZF4 ERBB3  | rs11171739 | A>G | 1.34 |
|              |                           | DGKA         | rs2292239  | C>A | 1.28 |
| T1D 12q24.13 | chr12:111278572-112592683 | NAA25 SH2B3  | rs3184504  | G>A | 1.27 |
|              |                           | NAA25 SH2B3  | rs17696736 | A>G | 1.28 |
|              |                           | NAA25 SH2B3  | rs653178   | A>G | 1.30 |
| T1D 12p13.31 | chr12:9366576-9820167     | CD69         | rs4763879  | G>A | 1.09 |
| T1D 13q32.3  | chr13:99240634-99534324   | GPR183       | rs9585056  | A>G | 1.12 |
| T1D 14q32.2  | chr14:97895009-98138364   |              | rs4900384  | A>G | 1.09 |
|              |                           |              | rs1456988  | A>C | 1.12 |
| T1D 14q24.1  | chr14:68071518-68485527   | RAD51B       | rs911263   | G>A | 1.12 |
| T1D 14q24.1  | chr14:68696738-68851345   | ZFP36L1      | rs1465788  | A>G | 1.16 |
| T1D 15q25.1  | chr15:78709357-78968794   | CTSH         | rs3825932  | G>A | 1.16 |
|              |                           | CTSH         | rs34593439 | A>G | 1.28 |
|              |                           | CTSH         | rs12148472 | G>A | 1.20 |
| T1D 15q14    | chr15:38522176-38701912   | RASGRP1      | rs72727394 | G>A | 1.15 |
| T1D 16p11.2  | chr16:28283985-29014657   | IL27         | rs4788084  | A>G | 1.16 |
|              |                           | IL27         | rs9924471  | G>A | 1.24 |
|              |                           | IL27         | rs151234   | C>G | 1.19 |
| T1D 16p13.13 | chr16:10923201-11372654   | CLEC16A DEXI | rs12708716 | G>A | 1.20 |
|              |                           | CLEC16A DEXI | rs193778   | A>G | 1.14 |
|              |                           | CLEC16A DEXI | rs12927355 | A>G | 1.23 |
| T1D 16q23.1  | chr16:75182342-75487132   |              | rs8056814  | G>A | 1.29 |
|              |                           |              | rs7202877  | A>C | 1.28 |
| T1D 17q21.31 | chr17:45903164-46788073   |              | rs1052553  | G>A | 1.12 |
| T1D 17q21.2  | chr17:40563547-40722575   |              | rs7221109  | A>G | 1.05 |
| T1D 17q12    | chr17:39226421-40084508   | GSDMB ORMDL3 | rs12453507 | C>G | 1.11 |
|              |                           | GSDMB ORMDL3 | rs2290400  | G>A | 1.15 |
| T1D 18q22.2  | chr18:69831437-69902924   | CD226        | rs763361   | G>A | 1.16 |
|              |                           | CD226        | rs1615504  | G>A | 1.13 |
| T1D 18p11.21 | chr18:12738414-12925254   | PTPN2        | rs1893217  | A>G | 1.21 |
|              |                           | PTPN2        | rs2542151  | A>C | 1.30 |
| T1D 19q13.33 | chr19:48592641-48763133   | FUT2         | rs516246   | G>A | 1.15 |
|              |                           | FUT2         | rs602662   | G>A | 1.12 |
| T1D 19q13.32 | chr19:46648121-46811943   |              | rs425105   | G>A | 1.16 |
|              |                           |              | rs402072   | G>A | 1.15 |
| T1D 19p13.2  | chr19:10280033-10517872   | TYK2         | rs34536443 | G>C | 1.49 |
|              |                           | TYK2         | rs12720356 | C>A | 1.22 |
| T1D 20p13    | chr20:1508984-1741341     |              | rs2281808  | A>G | 1.11 |
| T1D 21q22.3  | chr21:42389067-42458550   | UBASH3A      | rs11203203 | G>A | 1.14 |
|              |                           | UBASH3A      | rs11203202 | C>G | 1.16 |
| T1D 22q12.2  | chr22:29670355-30273198   | HORMAD2      | rs5753037  | G>A | 1.10 |
|              |                           | HORMAD2      | rs4820830  | A>G | 1.14 |
| T1D 22q12.3  | chr22:37171803-37262764   | RAC2 C1QTNF6 | rs229533   | A>C | 1.11 |
| T1D Xq28     | chrX:154425779-155057576  | GAB3         | rs2664170  | A>G | 1.16 |

Type 1 diabetes-associated SNP variants obtained from [www.immunobase.org](http://www.immunobase.org). rs10492166, rs11171710, rs12908309, rs56994090, rs6043409, rs6691977, rs6916742, rs9272346, rs941576 were not included on the Infinium ImmunoArray-24 v2 BeadChip Kit. rs9268645 is located in HLA and was therefore excluded from the analysis.

\*Excluded from GRS because odds ratio could not be found in the indicated reference.

T1D= type 1 diabetes, rsID=reference SNP cluster ID, OR=odds ratio, NA=not available.

**ESM Table 2 – HLA DR-DQ genotypes and corresponding odds ratios**

| Patient  | HLA-DRB1<br>locus 1 | HLA-DRB1<br>locus 2 | HLA-DQA1<br>locus 2 | HLA-DQA1<br>locus 1 | HLA-DQB1<br>locus 1 | HLA-DQB1<br>locus 2 | OR   |
|----------|---------------------|---------------------|---------------------|---------------------|---------------------|---------------------|------|
| Diab 065 | 0301                | 0301                | 0501                | 0501                | 0201                | 0201                | 10.4 |
| Diab 066 | 0404                | 1601                | 0102                | 0301                | 0302                | 0502                | 5.5* |
| Diab 068 | 0301                | 0401                | 0301                | 0501                | 0201                | 0302                | 47.2 |
| Diab 076 | 0301                | 09                  | 0303                | 0501                | 02                  | 02                  | 5.3  |
| Diab 077 | 0301                | 0403                | 0301                | 0501                | 02                  | 0302                | 2.5  |
| Diab 079 | 04                  | 13                  | 0102                | 0303                | 03                  | 06                  | 1.9  |
| Diab 080 | 01                  | 0301                | 0501                | 01                  | 05                  | 02                  | 2.6  |
| Diab 081 | 04                  | 16                  | 0102                | 0303                | 03                  | 05                  | 2*   |
| Diab 083 | 01                  | 0301                | 0501                | 0101                | 0501                | 02                  | 2.6  |
| Diab 084 | 12                  | 13                  | 0505                | 0505                | 0301                | 0301                | 0.7* |
| Diab 085 | 0301                | 0401                | 0301                | 0501                | 02                  | 0302                | 47.2 |
| Diab 086 | 0301                | 11                  | 0505                | 0501                | 02                  | 0301                | 0.2  |
| Diab 087 | 01                  | 16                  | 0102                | 0101                | 05                  | 05                  | 1.5  |
| Diab 088 | 0301                | 0401                | 0301                | 0501                | 02                  | 0302                | 47.2 |
| Diab 089 | 0301                | 0404                | 0301                | 0501                | 0201                | 0302                | 16.9 |
| Diab 090 | 03                  | 08                  | 0401                | 0501                | 2                   | 04                  | 1.6  |
| Diab 091 | 0301                | 0401                | 0301                | 0501                | 0201                | 0302                | 47.2 |
| Diab 092 | 0301                | 0404                | 0301                | 0501                | 0201                | 0302                | 16.9 |
| Diab 093 | 0301                | 0401                | 0301                | 0501                | 0201                | 0302                | 47.2 |
| Diab 094 | 01                  | 01                  | 0101                | 0101                | 05                  | 05                  | 1    |
| Diab 095 | 0101                | 0301                | 0501                | 0101                | 0501                | 0201                | 2.6  |
| Diab 096 | 0301                | 0401                | 0301                | 0501                | 0201                | 0302                | 47.2 |
| Diab 100 | 0301                | 0401                | 0301                | 0501                | 0201                | 0302                | 47.2 |
| Diab 101 | 0401                | 1301                | 0102                | 0301                | 0302                | 0604                | 7    |
| Diab 103 | 0301                | 0404                | 0301                | 0501                | 0201                | 0302                | 16.9 |
| Diab 104 | 0801                | 1601                | 0102                | 0401                | 0402                | 0502                | 1.6* |
| Diab 105 | 0301                | 0403                | 0301                | 0501                | 0201                | 0302                | 2.5  |
| Diab 106 | 0301                | 0401                | 0301                | 0501                | 0201                | 0302                | 47.2 |
| Diab 107 | 0301                | 0403                | 0301                | 0501                | 0201                | 0302                | 2.5  |
| Diab 108 | 0401                | 0701                | 0201                | 0301                | 0302                | 0202                | 8.2  |
| Diab 109 | 0301                | 0301                |                     |                     | 0201                | 0201                | 10.4 |
| Diab 110 | 0301                | 0401                | 0301                | 0501                | 0201                | 0302                | 47.2 |
| Diab 111 | 0301                | 0401                | 0301                | 0501                | 0201                | 0302                | 47.2 |
| Diab 112 | 0301                | 0301                | 0501                | 0501                | 0201                | 0201                | 10.4 |
| Diab 113 | 0101                | 0301                | 0101                | 0501                | 0201                | 0501                | 2.6  |
| Diab 114 | 0401                | 1101                | 0301                | 0505                | 0301                | 0302                | 2.2  |
| Diab 115 | 0301                | 1501                |                     |                     | 0201                | 0602                | 0.1  |
| Diab 116 | 0301                | 0404                | 0301                | 0501                | 0201                | 0302                | 16.9 |
| Diab 125 | 0301                | 0404                | 0303                | 0501                | 0201                | 0302                | 16.9 |
| Diab 126 |                     |                     |                     |                     |                     |                     | NA   |
| Diab 127 |                     |                     |                     |                     |                     |                     | NA   |

|          |      |      |      |      |      |      |      |
|----------|------|------|------|------|------|------|------|
| Diab 128 | 0401 | 1301 | 0103 | 0301 | 0302 | 0603 | 7    |
| Diab 129 | 0401 | 1301 | 0103 | 0301 | 0302 | 0603 | 7    |
| Diab 130 | 0101 | 0301 | 0101 | 0501 | 0201 | 0501 | 2.6  |
| Diab 132 | 0301 | 1301 | 0102 | 0501 | 0201 | 0604 | 1.3  |
| Diab 134 | 0401 | 0401 | 0301 |      | 0302 | 0302 | 11.9 |
| Diab 135 | 0301 | 1001 | 0105 | 0501 | 0201 | 0501 | 1*   |
| Diab 136 | 0403 | 0403 | 0301 |      | 0302 | 0302 | 0.5* |
| Diab 137 | 0101 | 0401 | 0101 | 0301 | 0302 | 0501 | 6.5  |
| Diab 138 | 0101 | 0401 | 0101 | 0303 | 0302 | 0501 | 6.5  |
| Diab 139 | 0301 | 1301 | 0102 | 0501 | 0201 | 0604 | 1.3  |
| Diab 140 | 0301 | 0401 |      |      | 0201 | 0302 | 47.2 |
| Diab 141 | 0301 | 0401 | 0303 | 0501 | 0201 | 0302 | 47.2 |
| Diab 142 | 0801 | 1301 | 0102 | 0401 | 0402 | 0604 | 0.7  |
| Diab 143 | 1601 | 1301 | 0102 | 0102 | 0502 | 0603 | 1*   |
| Diab 144 | 0101 | 0401 | 0101 | 0301 | 0302 | 0501 | 6.5  |
| Diab 145 | 0401 | 0701 | 0201 | 0301 | 0201 | 0302 | 8.2  |
| Diab 146 | 0301 | 0401 | 0301 | 0501 | 0201 | 0302 | 47.2 |
| Diab 147 | 0701 | 0901 | 0201 | 0302 | 0201 | 0303 | 0.9* |
| Diab 148 | 0302 | 0404 | 0303 | 0401 | 0302 | 0402 | 8.4* |
| Diab 149 | 0401 | 0401 | 0301 |      | 0302 | 0302 | 11.9 |
| Diab 150 | 0301 | 0401 | 0301 | 0501 | 0201 | 0302 | 47.2 |
| Diab 151 |      |      |      |      |      |      | NA   |
| Diab 152 | 0101 | 0401 | 0101 | 0301 | 0302 | 0501 | 6.5  |
| Diab 153 | 0301 | 0404 | 0303 | 0501 | 0201 | 0302 | 16.9 |
| Diab 154 | 0301 | 1101 | 0505 | 0505 | 0201 | 0301 | 0.2  |
| Diab 155 | 0301 | 0404 | 0301 | 0501 | 0201 | 0302 | 16.9 |
| Diab 156 | 0404 | 0701 | 0201 | 0301 | 0201 | 0302 | 1*   |
| Diab 157 | 0401 | 0401 | 0301 |      | 0302 | 0302 | 11.9 |
| Diab 158 | 0401 | 1601 | 0102 | 0301 | 0302 | 0502 | 5*   |
| Diab 159 | 0701 | 1301 | 0103 | 0201 | 0201 | 0603 | 0.8  |
| Diab 160 | 0301 | 1301 | 0102 | 0501 | 0201 | 0604 | 1.3* |
| Diab 161 | 0301 | 0402 | 0301 | 0501 | 0201 | 0302 | 15.2 |
| Diab 162 | 0301 |      | 0501 | 0501 | 0201 |      | 10.4 |
| Diab 163 | 0301 | 0401 | 0301 | 0401 | 0201 | 0302 | 47.2 |
| Diab 164 | 0402 | 1301 | 0102 | 0301 |      | 0604 | 2*   |
| Diab 165 | 0301 | 0401 | 0301 | 0501 | 0201 | 0302 | 47.2 |
| Diab 166 | 0301 | 0401 | 0301 | 0501 | 0201 | 0302 | 47.2 |
| Diab 167 | 0301 | 1601 |      |      | 0201 | 0502 | 3.1  |
| Diab 168 | 0101 | 0801 | 0401 | 0101 | 0501 | 0402 | 0.7  |

Type 1 diabetes odds ratios for HLA DR-DQ haplotypes as reported in (3).

\*Estimated odds ratios (not known from literature).

OR=odds ratio, NA=not available.

ESM Figure 1

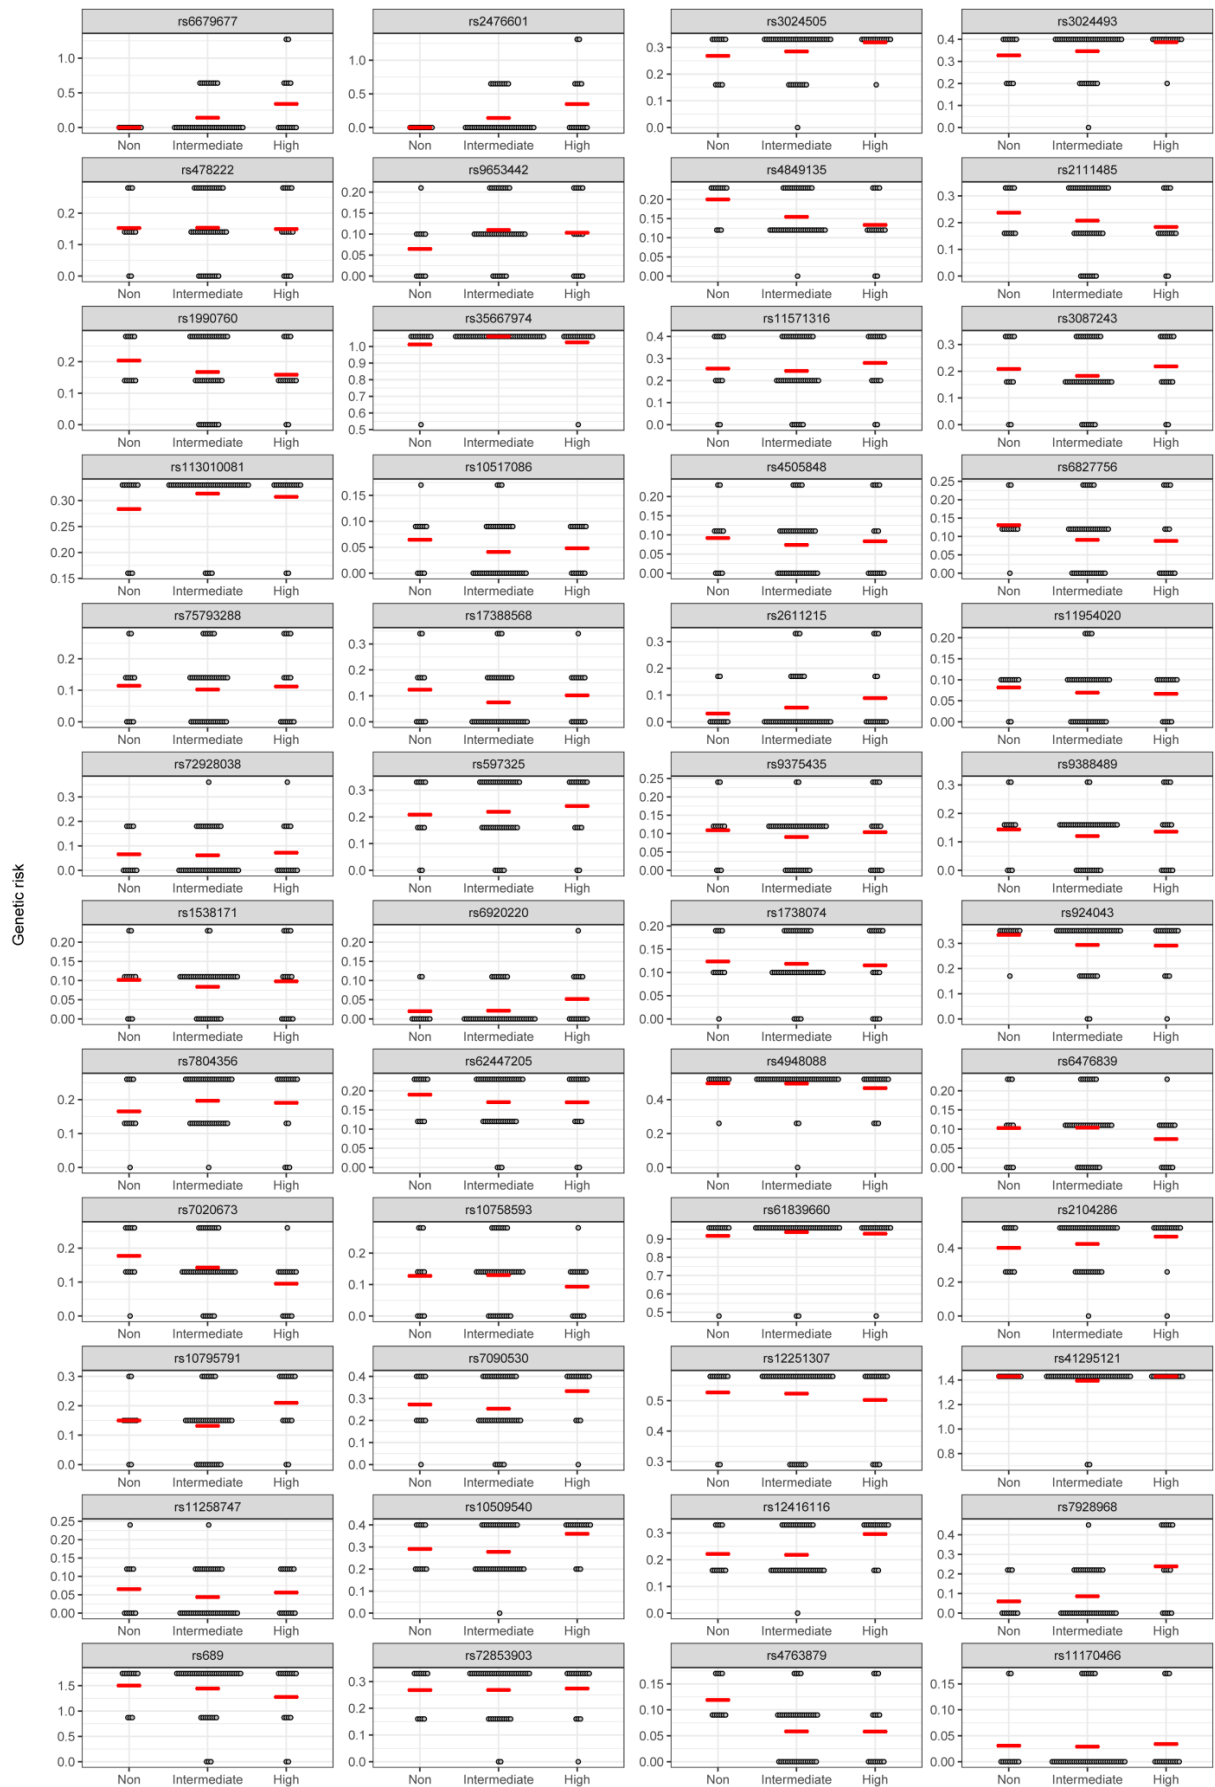

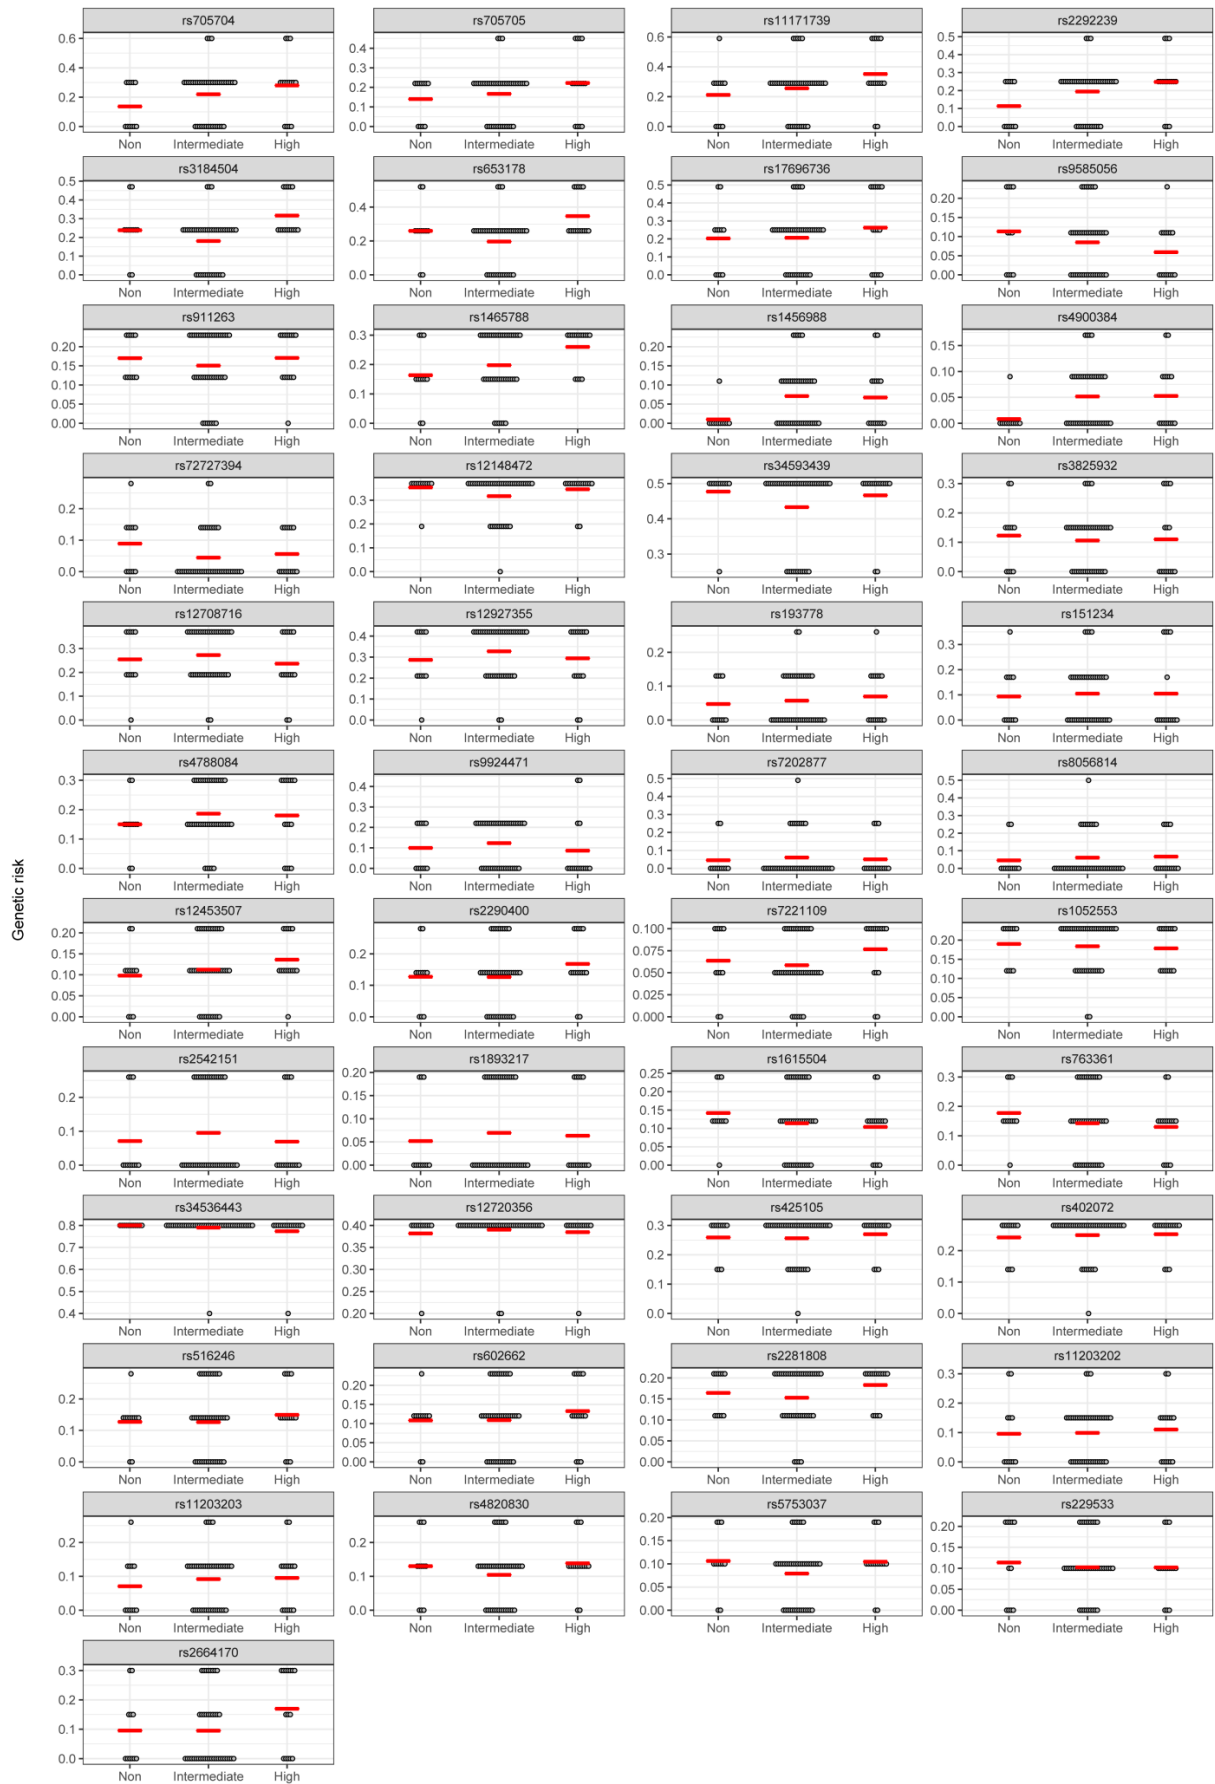

**Genetic risk per SNP variant in immune-responders.** Genetic risk per SNP variant per responder-group. For each SNP variant, dots indicate the genetic risk per patient:  $\text{Patient}_x - \text{SNP}_i = \ln(\text{OR}_{\text{SNP}_i}) * \text{copy}_{\text{SNP}_i}$ , where  $\text{Patient}_x$  refers to an individual patient,  $\text{SNP}_i$  to an individual SNP,  $\ln(\text{OR}_{\text{SNP}_i})$  to the natural logarithm of the OR of that SNP and  $\text{copy}_{\text{SNP}_i}$  to the number of risk alleles the patient has for that SNP. Horizontal red bars indicate group means. Non=non-responders, Intermediate=Intermediate responders, High=high responders.

**ESM Figure 2**

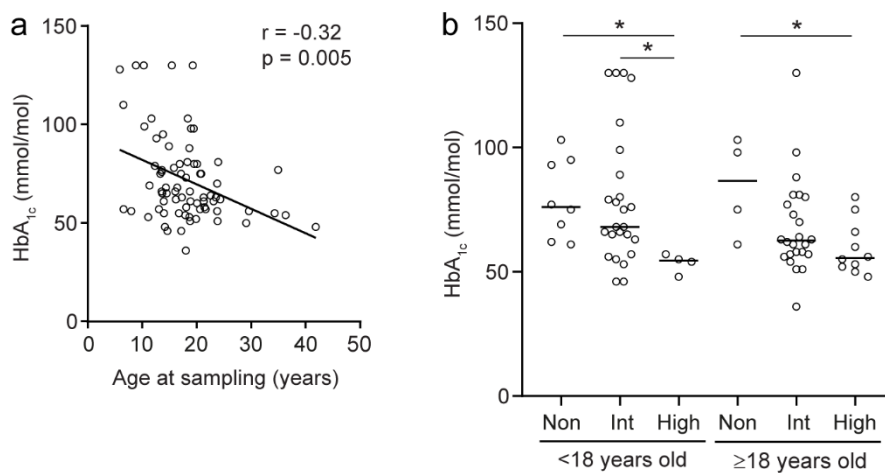

**Islet autoimmunity and HbA1c are not confounded by age at blood sampling.** (A) Spearman correlation between HbA1c and age at blood sampling in 75 individuals. (B) Age at blood sampling per responder-group for individuals stratified into teenagers (<18 years, n=37) and adults (≥18 years, n=38). Horizontal bars indicate group medians. Significance was tested using Dunn's multiple comparison test. Non=non-responders, Int=intermediate responders, High=high responders. \* $p < 0.05$ .
